# Supplementary material
Source: publisher figshare collection journal article supplement (https://acs.figshare.com/ndownloader/files/3823183)
Supplement: Supplementary file 1 [file 3823183]

# Multi-product steady-state isotopic transient kinetic analysis of the ethanol coupling reaction over hydroxyapatite and magnesia

Sabra Hanspal, Zachary D. Young, Heng Shou,<sup>†</sup> and Robert J. Davis\*

Department of Chemical Engineering, University of Virginia, 102 Engineers' Way, Charlottesville, VA 22904-4741, USA

<sup>†</sup>SABIC Technology Center, 1600 Industrial Blvd., Sugar Land, TX 77478, USA

\*rjd4f@virginia.edu

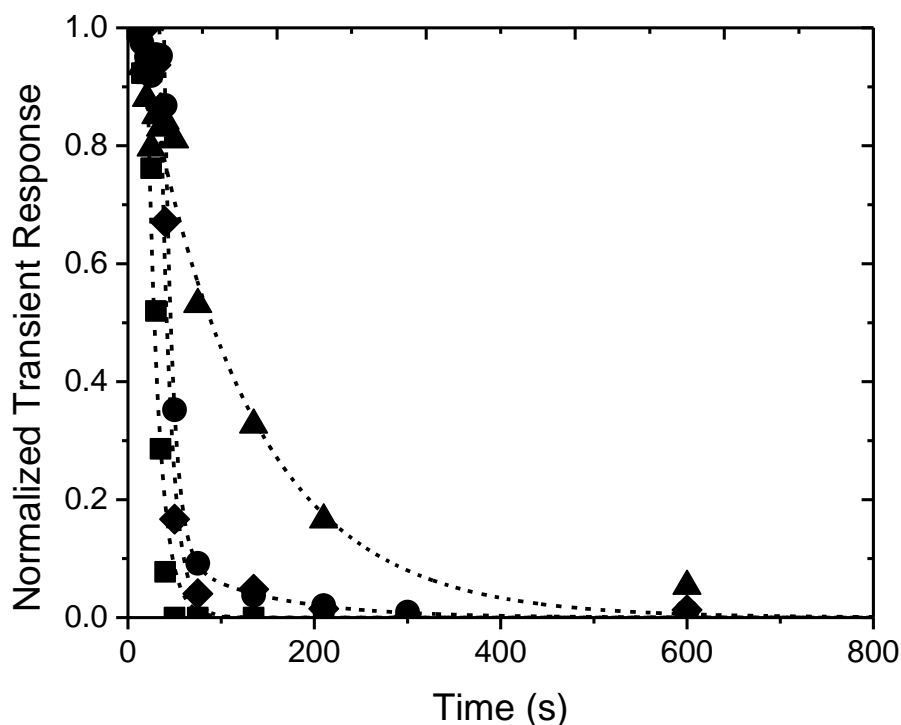

**Figure S1.** Normalized isotopic transient response curves following the switch from unlabeled ethanol to doubly labeled  $^{13}\text{C}$ -labeled ethanol with a total flow of  $30\text{ cm}^3\text{ min}^{-1}$  at 653 K during the coupling of ethanol over  $\text{MgO}$ . (■) argon, (◆) acetaldehyde, (●) ethanol, (▲) butanol.

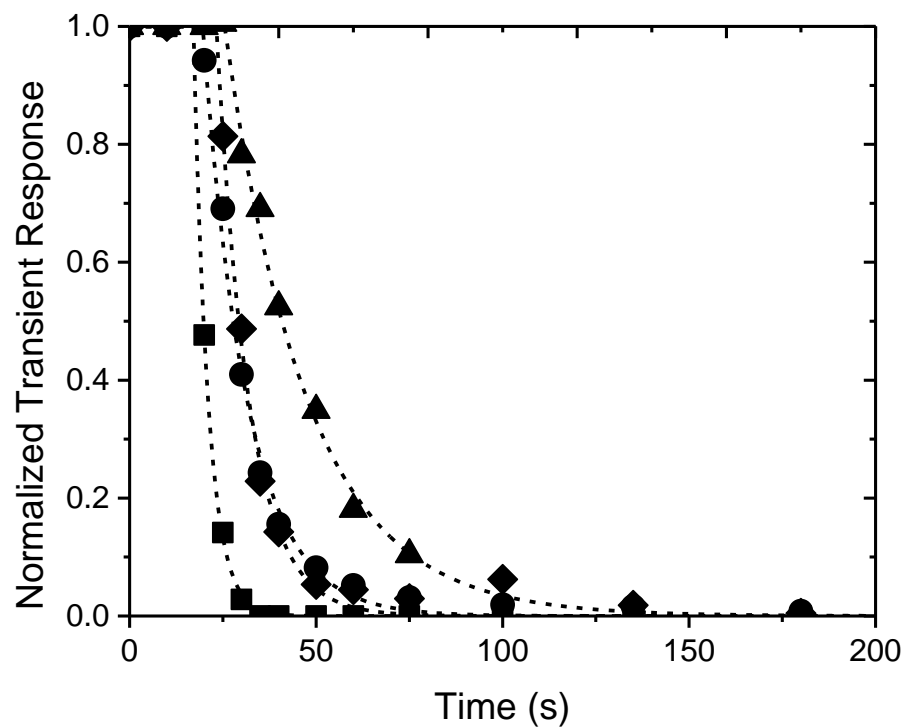

**Figure S2.** Normalized isotopic transient response curves following the switch from unlabeled ethanol to doubly labeled  $^{13}\text{C}$ -labeled ethanol with a total flow of  $75\text{ cm}^3\text{ min}^{-1}$  at  $653\text{ K}$  during the coupling of ethanol over  $\text{MgO}$ . (■) argon, (◆) acetaldehyde, (●) ethanol, (▲) butanol.

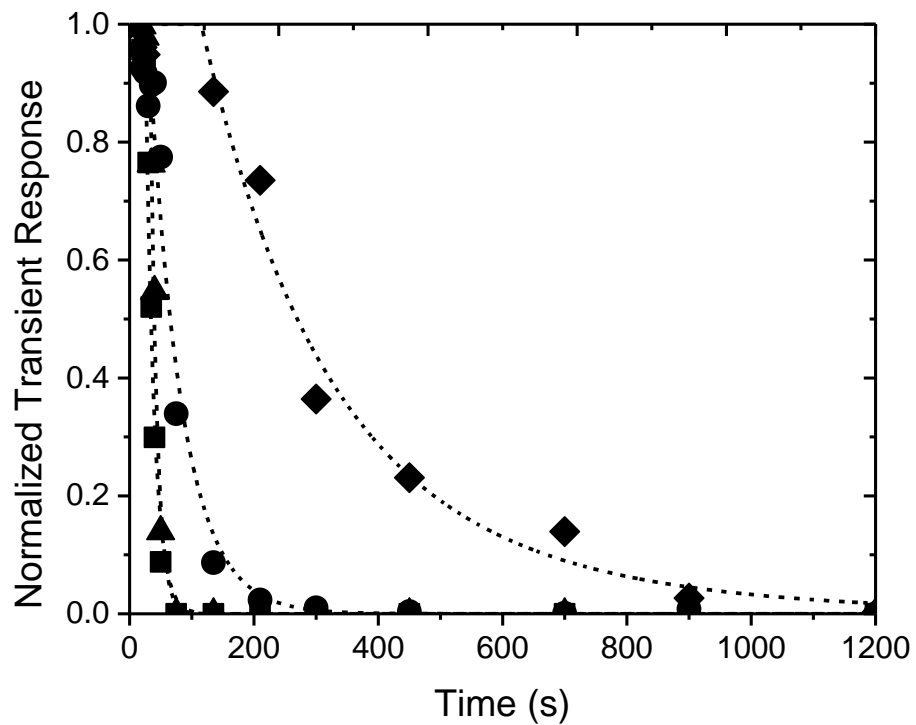

**Figure S3.** Normalized isotopic transient response curves following the switch from unlabeled ethanol to doubly labeled  $^{13}\text{C}$ -labeled ethanol with a total flow of  $30\text{ cm}^3\text{ min}^{-1}$  at 613 K during the coupling of ethanol over stoichiometric HAP. (■) argon, (◆) acetaldehyde, (●) ethanol, (▲) butanol.

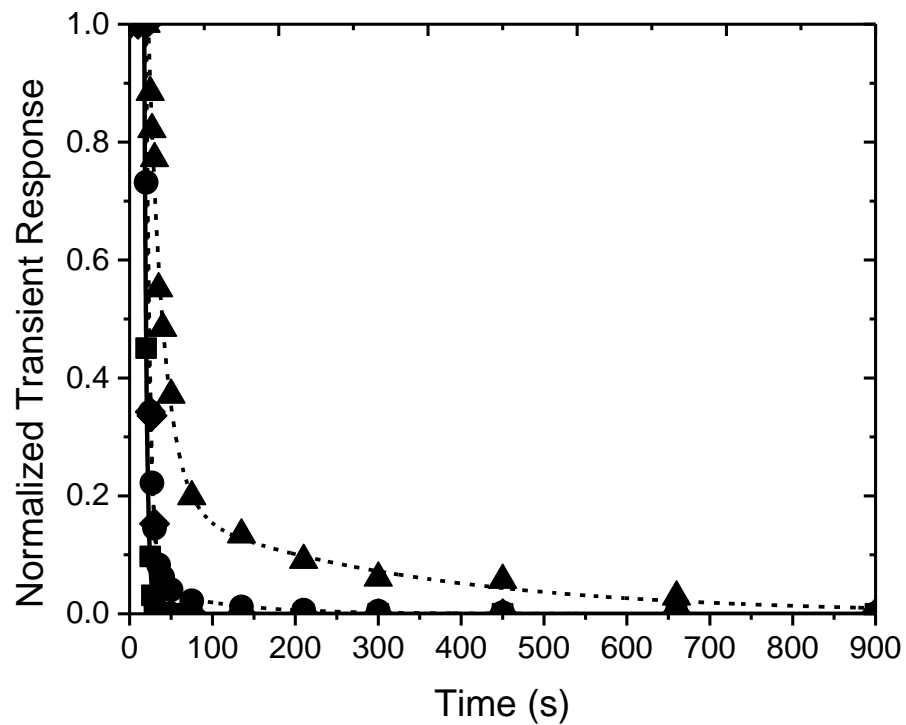

**Figure S4.** Normalized isotopic transient response curves following the switch from unlabeled ethanol to doubly labeled  $^{13}\text{C}$ -labeled ethanol with a total flow of  $75\text{ cm}^3\text{ min}^{-1}$  at 613 K during the coupling of ethanol over stoichiometric HAP. (■) argon, (◆) acetaldehyde, (●) ethanol, (▲) butanol.
